# Supplementary material for: Quantitative proteomics analysis of an ethanol- and a lactate-producing mutant strain of Synechocystis sp. PCC6803
Source: PubMed Central journal article supplement (PMC4526308; doi:10.1186/s13068-015-0294-z), 2015-08-05

**Additional file 2: Figure S1.** Whole-cell absorption spectra of *Synechocystis sp.* PCC6803 wild-type strain, ethanol-producing strain (SAA012), and latate-producing strain (SAW041) at mid-exponential growth phase.

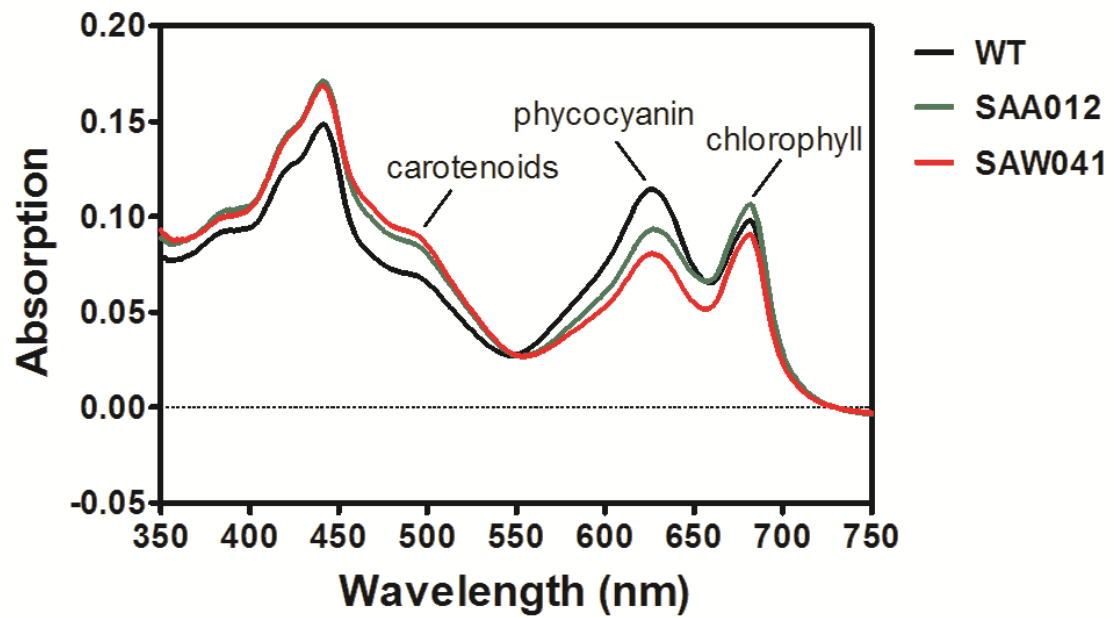

Supplement: 13068_2015_294_MOESM2_ESM.pdf [file 13068_2015_294_MOESM2_ESM.pdf]
